# Supplementary material for: Association Between Thrombogenicity Indices and Coronary Microvascular Dysfunction in Patients With Acute Myocardial Infarction
Source: PubMed Central journal article supplement — JACC Basic Transl Sci. 2021 Oct 25;6(9-10):749–61. doi: 10.1016/j.jacbts.2021.08.007 (PMC8559320; doi:10.1016/j.jacbts.2021.08.007), 2021-10-25
Supplement: mmc1.pdf [file mmc1.pdf]

## Supplemental Material

**Supplemental Figure 1. Texture feature selection using the LASSO model to determine risk factor for CMD: (A) The tuning parameter selection in the LASSO model used 10-fold cross-validation via minimum criteria; and (B) LASSO coefficient profiles of the 46 baseline features**

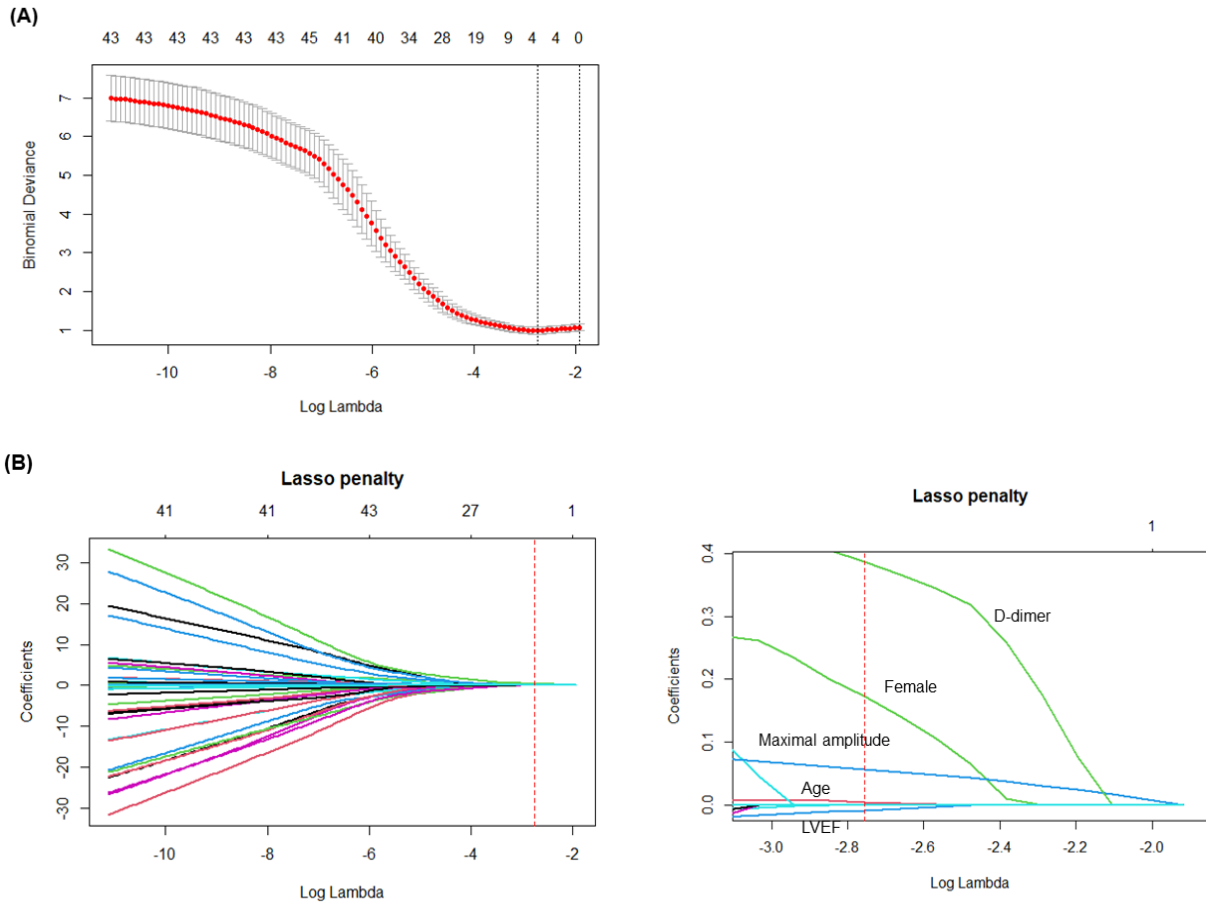

CMD = coronary microvascular dysfunction; LASSO = least absolute shrinkage and selection operator; LVEF = left ventricular ejection fraction.
